# Supplementary material for: Chagas Disease Vector Control in a Hyperendemic Setting: The First 11 Years of Intervention in Cochabamba, Bolivia
Source: PubMed Central journal article supplement (PMC3974664; doi:10.1371/journal.pntd.0002782), 2014-04-03
Supplement: pntd.0002782.s004.pdf [file pntd.0002782.s004.pdf]

**Table S2.** Triatomine bugs collected during the activities of the Chagas Disease Control Program of the Department of Cochabamba, Bolivia, 2007–2010**A. By year**

| Year         | Bugs captured | <i>T. infestans</i> | %            | Agresti-Coull 95%CI |              | <i>T. sordida</i> | %           | Others    | %           |
|--------------|---------------|---------------------|--------------|---------------------|--------------|-------------------|-------------|-----------|-------------|
|              |               |                     |              | Lower               | Upper        |                   |             |           |             |
| 2007         | 4027          | 3883                | 96.42        | 95.80               | 96.96        | 133               | 3.30        | 11        | 0.27        |
| 2008         | 1114          | 1054                | 94.61        | 93.12               | 95.80        | 60                | 5.39        | 0         | 0           |
| 2009         | 428           | 313                 | 73.13        | 68.73               | 77.12        | 110               | 25.70       | 5         | 1.17        |
| 2010         | 1752          | 1633                | 93.21        | 91.93               | 94.30        | 119               | 6.79        | 0         | 0           |
| <b>Total</b> | <b>7321</b>   | <b>6883</b>         | <b>94.02</b> | <b>93.45</b>        | <b>94.54</b> | <b>422</b>        | <b>5.76</b> | <b>16</b> | <b>0.22</b> |

**B. By municipality**

| Municipality  | <i>T. infestans</i> | <i>T. sordida</i> | Others    | Total       | % <i>T. infestans</i> | % <i>T. sordida</i> |
|---------------|---------------------|-------------------|-----------|-------------|-----------------------|---------------------|
| Aiquile       | 1722                | 134               | 9         | 1865        | 92.33                 | 7.18                |
| Anzaldo       | 35                  | 6                 | 1         | 42          | 83.33                 | 14.29               |
| Arani         | 93                  | 9                 | 0         | 102         | 91.18                 | 8.82                |
| Arque         | 36                  | 14                | 1         | 51          | 70.59                 | 27.45               |
| Capinota      | 46                  | 8                 | 0         | 54          | 85.19                 | 14.81               |
| Cliza         | 53                  | 0                 | 0         | 53          | 100                   | 0                   |
| Cochabamba    | 1939                | 66                | 1         | 2006        | 96.66                 | 3.29                |
| Independencia | 16                  | 0                 | 0         | 16          | 100                   | 0                   |
| Mizque        | 1177                | 110               | 2         | 1289        | 91.31                 | 8.53                |
| Morochata     | 3                   | 0                 | 0         | 3           | 100                   | 0                   |
| Omereque      | 414                 | 37                | 1         | 452         | 91.59                 | 8.19                |
| Pasorapa      | 316                 | 13                | 1         | 330         | 95.76                 | 3.94                |
| Pocona        | 2                   | 0                 | 0         | 2           | 100                   | 0                   |
| Pojo          | 313                 | 9                 | 0         | 322         | 97.20                 | 2.80                |
| Punata        | 161                 | 0                 | 0         | 161         | 100                   | 0                   |
| Quillacollo   | 41                  | 0                 | 0         | 41          | 100                   | 0                   |
| Sacaba        | 122                 | 1                 | 0         | 123         | 99.19                 | 0.81                |
| San Benito    | 1                   | 0                 | 0         | 1           | 100                   | 0                   |
| Santivañez    | 37                  | 0                 | 0         | 37          | 100                   | 0                   |
| Sicaya        | 56                  | 7                 | 0         | 63          | 88.89                 | 11.11               |
| Sipe Sipe     | 34                  | 0                 | 0         | 34          | 100                   | 0                   |
| Tacopaya      | 2                   | 0                 | 0         | 2           | 100                   | 0                   |
| Tapacarí      | 109                 | 0                 | 0         | 109         | 100                   | 0                   |
| Tiquipaya     | 4                   | 8                 | 0         | 12          | 33.33                 | 66.67               |
| Totora        | 74                  | 0                 | 0         | 74          | 100                   | 0                   |
| Vila Vila     | 77                  | 0                 | 0         | 77          | 100                   | 0                   |
| <b>Total</b>  | <b>6883</b>         | <b>422</b>        | <b>16</b> | <b>7321</b> | <b>94.02</b>          | <b>5.76</b>         |

**C. Natural infection with *Trypanosoma cruzi***

| Year         | Bugs examined | Infected   | % infected  |
|--------------|---------------|------------|-------------|
| 2007         | 1017          | 44         | 4.33        |
| 2008         | 654           | 81         | 12.39       |
| 2009         | 359           | 35         | 9.75        |
| 2010         | 1109          | 88         | 7.94        |
| <b>Total</b> | <b>3139</b>   | <b>248</b> | <b>7.90</b> |
